1 **Title: Baculovirus-inducing fast-acting innate immunity kills *Plasmodium* liver**  
2 **stages**

3

4 **Running title:** Baculovirus acts as an anti-malaria liver-stage agent

5

6 **Authors:** Talha Bin Emran<sup>a</sup>, Mitsuhiro Iyori<sup>a</sup>, Yuki Ono<sup>a</sup>, Fitri Amelia<sup>a</sup>, Yenni Yusuf<sup>a</sup>,  
7 Ashekul Islam<sup>a</sup>, Asrar Alam<sup>a</sup>, Ryohei Ogawa<sup>b</sup>, Hiroyuki Matsuoka<sup>c</sup>, Daisuke S. Yamamoto<sup>c</sup>,  
8 Shigeto Yoshida<sup>a</sup>

9

10 **Affiliations:**

11 <sup>a</sup>Laboratory of Vaccinology and Applied Immunology, Kanazawa University School of  
12 Pharmacy, Kakuma-machi, Kanazawa 920-1192, Japan.

13 <sup>b</sup>Department of Radiological Sciences, University of Toyama, 2630 Sugitani, Toyama  
14 930-0194, Japan

15 <sup>c</sup>Division of Medical Zoology, Department of Infection and Immunity, Jichi Medical

16 University, 3311-1 Yakushiji, Shimotsuke, 329-0431, Japan.

17

18 Address correspondence to Shigeto Yoshida, [shigeto@p.kanazawa-u.ac.jp](mailto:shigeto@p.kanazawa-u.ac.jp)

19

20

21 **ABSTRACT**

22 Baculovirus (BV), an enveloped insect virus with a circular double-stranded DNA genome,  
23 possesses unique characteristics that induce strong innate immune responses in mammalian  
24 cells. Here, we show that BV administration not only sterilely protects BALB/c mice for at  
25 least 7 days from subsequent *Plasmodium berghei* sporozoite infection but also eliminates  
26 existing liver-stage parasites completely, effects superior to those of primaquine, and does  
27 so in a TLR9-independent manner. Six hours post-BV administration, IFN- $\alpha$  and IFN- $\gamma$   
28 were robustly produced in serum, and RNA transcripts of interferon-stimulated genes were  
29 drastically upregulated in the liver. The *in vivo* passive transfer of post-BV administration  
30 serum effectively eliminated liver-stage parasites, and IFN- $\alpha$  neutralization abolished this  
31 effect, indicating that the BV liver-stage parasite killing mechanism is downstream of the  
32 type I IFN signaling pathway. Our results demonstrate that BV is a potent IFN-inducing  
33 prophylactic and therapeutic agent with great potential for further development as a new  
34 malaria vaccine and/or anti-hypnozoite drug.

35

## 36 INTRODUCTION

37 Malaria remains a severe public health problem and causes significant economic losses  
38 worldwide. In 2016, there were approximately 216 million malaria cases and an estimated  
39 445,000 malaria deaths, mainly in children under five (1). Malaria infection is initiated  
40 following injection of *Plasmodium* sporozoites into the skin during the taking of a blood  
41 meal by *Anopheles* mosquitoes. The sporozoites migrate to the liver and invade hepatocytes.  
42 Before clinical symptoms of malaria occur during the blood stage of infection, *Plasmodium*  
43 *falciparum* in the liver develop into exoerythrocytic schizonts for 5 to 6 days. *P. vivax* and *P.*  
44 *ovale* can develop dormant liver-stage forms, known as hypnozoites, which cause relapsing  
45 blood-stage infections months or years after the primary infection. Currently, the only  
46 licensed drug for the radical cure of *P. vivax* hypnozoites is primaquine (PQ), and  
47 artemisinin-based combination therapies are recommended by the World Health  
48 Organization (WHO) as the first-line treatment for blood-stage *P. falciparum* malaria.  
49 However, PQ has a high associated risk of life-threatening haemolytic anaemia in people  
50 with glucose-6-phosphate-dehydrogenase enzyme (G6PD) deficiency (2). For future

51 malaria eradication strategies, safer radical curative compounds that efficiently kill  
52 hypnozoites are required.

53 A series of studies performed by Nussenzweig and colleagues in 1986–1987 revealed  
54 that exogenously administered interferon (IFN)- $\gamma$  effectively inhibits development of  
55 liver-stage parasites *in vitro* and *in vivo* (3-6). Recently, Boonhok *et al.* reported that  
56 IFN- $\gamma$ -mediated inhibition occurs at least partially in an autophagy-related  
57 protein-dependent manner in infected hepatocytes (7). Additionally, Liehl *et al.* reported  
58 that hepatocytes infected with liver-stage parasites induce a type I IFN secretion via the  
59 host cells sensing *Plasmodium* RNA, resulting in reduction of the liver-stage burden (8).  
60 These findings suggest that IFN-mediated immunotherapy against liver-stage parasites  
61 might be effective. However, new anti-hypnozoite drugs (e.g. recombinant IFNs or  
62 appropriate IFN inducers) have not been developed yet.

63 *Autographa californica* nucleopolyhedrosis virus (AcNPV), a type of baculovirus  
64 (BV), is an enveloped, double-stranded DNA virus that naturally infects insects. BVs  
65 possess unique characteristics that activate dendritic cell (DC)-mediated innate immunity

66 through MyD88/Toll-like receptor 9 (TLR9)-dependent and -independent pathways (9).  
67 Takaku and colleagues reported that BV also directly activates murine natural killer (NK)  
68 cells through the TLR9 signalling pathway (10, 11), which leads to induction of NK  
69 cell-dependent anti-tumour immunity. Based on the unique adjuvant properties of BV that  
70 induce DC maturation and NK cell activation, which are prerequisites for generating robust  
71 and long-lasting adaptive immune responses, we have developed BV-based malaria  
72 vaccines effective for all three parasite stages, the pre-erythrocytic stage (12-14), asexual  
73 blood stage (15, 16), and sexual stage (17, 18).

74 Here, we investigated BV-mediated innate immunity against the pre-erythrocytic stage  
75 parasites. Our results clearly demonstrate that BV intramuscular administration not only  
76 elicits short-term sterile protection against *Plasmodium* sporozoite infection but also  
77 eliminates liver-stage parasites completely through the type I IFN signalling pathway. We  
78 propose that, due to its potent IFN-inducing function, BV has great potential for  
79 development into not only a new malaria vaccine platform capable of protecting  
80 vaccinators for a short period before and after malaria infection but also a new

81 non-haemolytic single-dose alternative to PQ.

## 82 **RESULTS**

### 83 **BV administration induce transgene expression and innate immune responses**

84 This study investigated the effects induced by BV on innate immune responses relating  
85 to malaria infection. We used BES-GL3 harbouring two gene cassettes consisting of the  
86 *luciferase* gene under the control of the *CMV* promoter and the *DAF* gene under the control  
87 of the *p10* promoter, which were designed to express luciferase as a transducing marker and  
88 to display DAF as protection for BV from complement attack, respectively (19). BES-GL3  
89 intramuscular administration into the left thigh muscle of mice initially increased the  
90 luciferase expression levels robustly, but these levels gradually decreased to 2% on day 28  
91 (Fig. 1A), which is consistent with previous studies (19, 20). Among various cell types  
92 tested *in vitro*, hepatocytes were found to take up BV most effectively (21), suggesting a  
93 potential use for BV as a vector for liver-directed gene transfer. However, direct evidence  
94 of *in vivo* liver-directed gene transfer has not been reported because BV-mediated gene  
95 transfer into hepatocytes via intravenous injection is severely hampered by serum

96 complement (22). We found for the first time that intravenous administration of BV  
97 effectively transduces hepatocytes *in vivo* (Fig. 1B).

98 We next examined the kinetics of proinflammatory cytokines, ALT, and AST in sera  
99 following BES-GL3 intravenous administration. IFN- $\gamma$  and TNF- $\alpha$  levels rapidly reached  
100 their peaks at 6 h and decreased to baseline by 24 h (Fig. 1, C and D). Similarly, the ALT  
101 and AST levels rapidly reached their peaks at 12 h and decreased to baseline by 48 h (Fig. 1,  
102 E and F). Compared with intravenous administration, intramuscular administration did not  
103 affect the ALT levels; although the AST level trended higher, this difference did not reach  
104 statistical significance (Fig. 1, G and H). ALT is a sensitive indicator of liver damage, so  
105 these results suggest that, for BV, intramuscular administration may be less destructive than  
106 intravenous administration.

107

### 108 **BV administration elicits sterile protection against sporozoite**

109 Table 1 summarizes the protective efficacy results for BV administration against malaria  
110 sporozoite challenge. First, to examine the effects of BV intravenous administration, mice



111 were intravenously administered  $10^7$  pfu of BES-GL3. At 6 h post-BV injection, which  
112 coincides with peak IFN- $\gamma$  production, the mice were intravenously challenged by 1,000  
113 Pb-conGFP sporozoites, which are transgenic *P. berghei* constitutively expressing GFP. All  
114 BV-injected mice were protected, whereas all PBS- and AdHu5-injected mice treated  
115 similarly became infected. Next, we investigated the effects of BES-GL3 intramuscular  
116 administration ( $10^8$  pfu) followed by sporozoite challenge at various intervals post-BV  
117 injection. After intramuscular administration of BES-GL3, all mice were protected for at  
118 least 7 days. However, there was a complete loss of protection by 14 days post-BES-GL3  
119 intramuscular administration, and no delay of parasitaemia was observed in these mice.  
120 Additionally, no protection was observed in mice treated intranasally with BES-GL3.

121 BES-GL3 intravenous administration failed to provide protection against challenge with  
122 1,000 parasitized red blood cells (pRBCs) at 6 h post-BV injection, indicating that BV has  
123 no residual effect on blood-stage parasites. CpG intramuscular administration at 6 or 24 h  
124 prior to challenge conferred protection against sporozoite challenge in 90% or 80% of mice,  
125 respectively. This is consistent with previous work showing short-term (2-days) protection

126 induced by CpG intramuscular administration (50  $\mu$ g) against challenge with 100 *P. yoelii*  
127 sporozoites (23), although only partial protection (50%) was observed when the challenge  
128 occurred at 7 days post-CpG intramuscular injection. Thus, the protective efficacy induced  
129 by BES-GL3 intramuscular administration is more effective and longer-lasting (7 days)  
130 compared with CpG. All PBS-treated control mice developed blood-stage infection within  
131 6 days following an intravenous injection of 1,000 Pb-conGFP sporozoites.

132

### 133 **BV administration completely eliminates of liver-stage parasites**

134 Pathways stimulated by type I and II IFNs can lead to the killing of hepatocytes infected  
135 with liver-stage parasites (3-8). Because BV is a potent inducer of type I and II IFNs (24,  
136 25), and we observed BV-mediated protection as described above, we next investigated  
137 whether BV-induced IFNs could kill liver-stage parasites *in vivo*. To examine the  
138 elimination effects on the trophozoite and exoerythrocytic (mature) schizont stages, we  
139 administered BES-GL3 intravenously or intramuscularly at two different intervals  
140 following sporozoite challenge, 24 and 42 h, respectively. Table 2 summarizes these results

141 on the elimination efficacy of BES-GL3 administration against liver-stage parasites.  
142 Blood-stage parasites were completely prevented in all mice intravenously injected with  
143 BES-GL3 24 h post-infection; in contrast, the protective effectiveness of BES-GL3  
144 intravenous administration was diminished when mice did not receive it until 42 h  
145 post-infection. The same results were obtained when mice were intramuscularly injected  
146 with BES-GL3.

147 To visualize the parasite elimination by BV, mice were infected with Pb-Luc, which is  
148 transgenic *P. berghei* constitutively expressing luciferase, and then examined via IVIS; this  
149 is a highly sensitive method for detecting liver- and blood-stage parasites. Parasites were  
150 observed in the liver at both 24 h and 42 h post-infection (Fig. 2, A and B, respectively; left  
151 panels). BES-GL3 intramuscular administration into the left thigh muscle at 24 h  
152 post-infection completely eliminated the liver-stage parasites at 72 h post-infection,  
153 whereas the PBS control treatment failed to prevent the development of blood-stage  
154 parasites (Fig. 2A; right panel). Although BES-GL3 intramuscular administration into the  
155 right thigh muscle at 42 h post-infection also failed to prevent the development of

156 blood-stage parasites (Fig. 2B; right panel), it caused a significant delay of parasitaemia  
157 (Fig. 2C). This result indicates that even for exoerythrocytic schizonts (42 h post-infection),  
158 the elimination effect of BV intramuscular administration was invoked in the liver within  
159 2–6 h because the exoerythrocytic merozoites of *P. berghei* are released from infected  
160 hepatocytes into the blood stream 44–48 h after the liver stage (26). Lower doses ( $10^4$  and  
161  $10^6$  pfu) of BES-GL3 administered at 24 h post-infection failed to prevent blood-stage  
162 parasites. However, a significant delay of parasitaemia was observed for the dose of  $10^6$  pfu  
163 of BES-GL3 (Fig. 2D), indicating that the elimination effect is dependent on the amount of  
164 BV that is intramuscularly administered.

165 As PQ is the only licensed drug for the radical cure of *P. vivax* hypnozoites, we  
166 compared the elimination effects of BV with those of PQ. Two different doses of PQ, high  
167 dose (2 mg/mouse) and low dose (0.1 mg/mouse), were intraperitoneally administered;  
168 these doses are 533 and 27 times, respectively, higher than the WHO recommended dose  
169 per weight for people. A single administration of high dose PQ completely eliminated the  
170 liver-stage parasites (Table 2), whereas low dose PQ was suboptimal, producing only a

171 reduction in parasite burden in the liver and significant delay of parasitaemia (Fig. 2C). The  
172 WHO-recommended treatment schedule for PQ is 15 mg/day for 14 days, but because high  
173 doses of PQ often cause side effects like nausea, vomiting, and stomach cramps, these side  
174 effects can limit patient compliance, potentially resulting in PQ resistance (27, 28). Thus,  
175 BV intramuscular administration may have important advantages of over PQ.

176

### 177 **BV-mediated liver-stage parasite killing is due to TLR9-independent pathways**

178 CpG intramuscular administration completely eliminated early liver-stage parasites (6 h  
179 post-infection) (Table 3); however, although it caused a significant delay of parasitaemia, it  
180 had little effect on mature schizonts (24 h post-infection) (Fig. 2C). BV possesses unique  
181 characteristics that activate DC-mediated innate immunity through  
182 MyD88/TLR9-dependent and -independent pathways (9). Therefore, we next investigated  
183 whether TLR9 plays an important role in BV-mediated parasite killing in the liver. A single  
184 dose of intramuscularly administered BES-GL3 completely prevented blood-stage parasites  
185 in all TLR9<sup>-/-</sup> mice previously infected with liver-stage parasites. In contrast, no elimination

186 effect or parasitaemia delay was observed following CpG intramuscular administration in  
187 TLR9<sup>-/-</sup> mice (Table 3). These results clearly demonstrate that BV-mediated parasite killing  
188 occurs via TLR9-independent pathways.

189 BV intravenous administration was reported to produce type I IFNs through  
190 TLR-independent and IRF3-dependent pathways in mice (9). To further investigate IFN  
191 production following BV intramuscular administration, the IFN serum levels were  
192 measured in WT and TLR9<sup>-/-</sup> mice 6 h after BES-GL3 intramuscular administration. As  
193 with intravenous administration, BES-GL3 intramuscular administration produced IFN- $\alpha$  in  
194 not only WT mice ( $6,311 \pm 2,363$  pg/ml) but also TLR9<sup>-/-</sup> mice ( $1,590 \pm 737$  pg/ml), whilst  
195 mice intramuscularly injected with PBS or CpG did not produce detectable IFN- $\alpha$  ( $< 20.0$   
196 pg/ml) (Fig. 3A). IFN- $\gamma$ , a type II IFN, was also produced in both WT mice ( $1,367 \pm 1,303$   
197 pg/ml) and TLR9<sup>-/-</sup> mice ( $488 \pm 132$  pg/ml) (Fig. 3B). CpG intramuscular administration  
198 induced much less IFN- $\gamma$  compared with BV, but it induced a robust IL-12 response (Fig.  
199 3C). Notably, CpG intravenous administration induced a high level of IFN- $\gamma$  with  
200 considerable systemic side effects (29, 30).

201

202 **Liver-stage parasites are killed by IFN-mediated immunity**

203 To determine whether the serum cytokines act as effectors against liver-stage parasites, a  
204 serum transfer assay was performed. Pooled sera were collected from donor mice 6 h after  
205 they were intramuscularly injected with BES-GL3 or PBS. An aliquot of the pooled sera  
206 (100  $\mu$ l/animal) was transferred to each recipient mouse 24 h after intravenous injection  
207 with 1,000 sporozoites. One of the five recipient mice effectively eliminated the liver-stage  
208 parasites, and the other four infected recipient mice showed a significant delay in the time  
209 to 1% parasitaemia (mean delay of 3.54 days;  $p = 0.0008$ , compared with the PBS sera  
210 group) (Fig. 3D).

211 We next examined whether neutralization of IFN- $\alpha$  or IFN- $\gamma$  in the sera altered the effect  
212 of the sera on liver-stage parasites. Either anti-IFN- $\alpha$  or anti-IFN- $\gamma$  antibody was incubated  
213 with 100  $\mu$ l of the sera, which contained 8,619 pg/ml of IFN- $\alpha$  and 4,705 pg/ml of IFN- $\gamma$ .  
214 Complete neutralization of IFN- $\alpha$  was confirmed by ELISA (see Fig. S1 in the  
215 supplemental material). The IFN- $\alpha$ - or IFN- $\gamma$ -neutralized sera (100  $\mu$ l) was intravenously

216 administered to recipient mice that had been intravenously injected with 1,000 sporozoite  
217 24 h before. The anti-IFN- $\alpha$  antibody treatment completely abrogated the serum-induced  
218 delay of parasitaemia, whereas the anti-IFN- $\gamma$  antibody treatment only partially impaired  
219 the serum-induced elimination effect (Fig. 3D). To assess the effects of exogenous IFN- $\alpha$   
220 and IFN- $\gamma$  on elimination of liver-stage parasites, recombinant IFN- $\alpha$  (8,619 pg/mouse) or  
221 recombinant IFN- $\gamma$  (4,705 pg/mouse) was intravenously administered to mice that had been  
222 intravenously injected with 1,000 sporozoites 24 h before. IFN- $\alpha$  administration completely  
223 eliminated the liver-stage parasites, whereas IFN- $\gamma$  administration only partially eliminated  
224 them but caused a significant delay in the time to 1% parasitaemia (mean delay of 4.82  
225 days;  $p = 0.0082$ , compared with the PBS group) (Fig. 3E). The IFN- $\alpha$ -mediated parasite  
226 elimination may be mediated via an effector mechanism distinct from that activated by  
227 IFN- $\gamma$ . It is also possible that the effector mechanisms induced by IFN- $\alpha$  and IFN- $\gamma$  may  
228 still be synergistically operative but that an alternate protective mechanism may be  
229 activated by BV. Similarly, Miller *et al.* showed that IFN- $\gamma$  produced by NKT cells  
230 following type I IFN signalling from infected hepatocytes play an important role on



231 elimination of liver-stage parasites (31). Table S1 summarizes the results on the elimination  
232 efficacy against liver-stage parasites of serum transfer and IFN administration.

233

234 **IFN-stimulated genes (ISGs) are upregulated in the liver post-BV intramuscular**  
235 **administration**

236 Signal transduction of type I IFNs results in the induction of numerous ISGs (32). Some  
237 ISGs participate in direct antimicrobial activities, such as apoptosis induction and  
238 post-transcriptional event regulation for microbial killing, mainly acting as antiviral  
239 responses. Gene targeting studies have distinguished four effector pathways of the  
240 IFN-mediated antiviral response: the Mx GTPase pathway, 2'-5' oligoadenylate-synthetase  
241 (OAS)-directed ribonuclease L pathway, protein kinase R (PKR) pathway, and ISG15  
242 ubiquitin-like pathway (33). Additionally, several ISGs, such as IFN-induced proteins with  
243 tetratricopeptide repeats (IFITs), as well as the transcription factors IRF3 and IRF7 are  
244 responsible for sensing the liver-infection by *Plasmodium* sporozoites (8). To confirm the  
245 involvement of ISGs, the gene expression in the livers of mice intramuscularly injected

246 with BES-GL3 were measured by quantitative RT-PCR (qRT-PCR). BES-GL3 significantly  
247 induced the gene expression of antiviral proteins (*Isg15*, *Mx1*, *Oas1a/b*, *Oasl1*, and *Pkr*) in  
248 wildtype (WT) mice (Fig. 4A). All these genes, except *Oas1a/b*, possibly due to the gene  
249 locus, were also upregulated by BV in TLR9<sup>-/-</sup> mice. Gene expression of IFIT proteins, such  
250 as *Ifit1*, *Ifit3*, and *Ifit44*, were markedly and significantly enhanced in both WT and TLR9<sup>-/-</sup>  
251 mice (Fig. 4B). Gene expression of the transcription factors *Irf3* and *Irf7* were also induced  
252 by BV in the same manner (Fig. 4C). These results indicate that systemic type I IFN  
253 secretion following BV intramuscular administration in the thigh muscle strongly induced  
254 ISGs in the liver.

255

256 **AdHu5-prime/BDES-boost heterologous immunization regimen confers sterile**  
257 **protection and complete elimination**

258 To evaluate our newly developed malaria vaccine in an AdHu5-prime/BDES-boost  
259 heterologous immunization regimen (14), mice were challenged twice (before and after)  
260 BDES-sPfCSP2-boost following AdHu5-prime. All mice survived without any symptoms

261 following both the first and second challenges (Table S2, Group 2). In contrast,  
262 AdHu5-prime immunization alone did not confer protection (Group 1). All control mice  
263 intramuscularly injected with PBS became infected (Groups 3 and 4). Thus, BDES-PfCSP  
264 boosting was able to exert not only a therapeutic effect on liver-stage parasites but also a  
265 prophylactic effect on sporozoites. The animal experimental designs are illustrated in Fig.  
266 S2, E and F.

267

268 **DISCUSSION**

269       Here, we show that BV intramuscular administration not only elicits short-term sterile  
270 protection against sporozoite infection but also eliminates liver-stage parasites completely.  
271 For liver-stage parasites proliferating vigorously at 24 h post-infection, the BV-induced  
272 fast-acting innate immune responses completely kill them within the following 20 h and  
273 prevent blood-stage parasite development in the absence of any clinical symptoms, which is  
274 more effective than PQ in a mouse model with early liver-stage *P. berghei*. The *P. berghei*  
275 liver-stage model is thought to correlate with anti-hypnozoite activity in primates (34). PQ  
276 is currently the only available drug that kills the dormant hypnozoites of *P. vivax*, but its  
277 severe side effects in G6PD-deficient people prevent the widespread use of this drug (35).  
278 The presence of hypnozoites and their drug-insensitivity form a major hurdle for malaria  
279 elimination programmes. Although BV has not been tested in a clinical setting yet, our  
280 previous study showed that the BV-based vaccine vector is safe and well-tolerated with  
281 acceptable reactogenicity and systemic toxicity in a primate model (13). Thus, BV offers a  
282 promising new non-haemolytic single-dose alternative to PQ for first-in-human clinical

283 trials. Further experiments to determine optimum BV administration routes and dosages are  
284 needed.

285 BV possesses attractive attributes as a new vaccine vector (e.g., its low cytotoxicity,  
286 inability to replicate in mammalian cells and absence of pre-existing antibodies against it).

287 This study demonstrates the further unique advantage of BV as a therapeutic vaccine vector

288 with short-term protection via an intrinsic potent immunostimulatory property. In a Phase

289 II–III malaria vaccine trial, all volunteers are presumptively treated with three daily doses

290 of anti-malaria drug one week before final vaccination and rechecked for asexual *P.*

291 *falciparum* parasitaemia one week after the final vaccination. Any subject who tests

292 parasite-positive is treated with a second line drug or excluded from the trial (36). Thus,

293 clinical trials aim to test vaccine efficacy after all vaccine schedules are completed to assess

294 the maximum effect. For clinical application, however, vaccinators are still in danger of

295 infection until the full vaccination schedule is completed, even though improved effective

296 vaccine would be developed. This study shows that our newly developed heterologous

297 AdHu5-PfCSP-prime and BDES-PfCSP-boost vaccine eliminated liver-stage parasites that

298 had infected the mice 24 h before administration of the BDES-boost and also elicited sterile  
299 protection against sporozoite challenge 21 days post-boost. We propose that BV-based  
300 vaccines can not only minimize the risk of infection for vaccinators during the vaccination  
301 schedule but also generate robust and long-lasting adaptive immune responses via  
302 stimulation of the innate immune system. Alternatively, BV itself may also be used as an  
303 additive to eliminate liver-stage parasites and impart this short-term protection to RTS,S or  
304 other licensed vaccines.

305       This study showed that IFN- $\alpha$  and IFN- $\gamma$  were rapidly and robustly produced in serum  
306 6 h post-BV administration. Interestingly, the prophylactic effect against sporozoite  
307 infection lasted for at least 7 days, even after IFN levels returned to baseline. In the case of  
308 ‘natural’ *Plasmodium* liver-stage infection, the infected hepatocytes induce IFN- $\alpha$ , resulting  
309 in a reduction of the liver-stage burden (8). However, the parasite-induced IFN- $\alpha$  responses  
310 fail to eliminate every parasite. This implies that the endogenous innate immune responses  
311 may be not strong enough for complete elimination and/or that the innate immune response  
312 peak occurs at the end of liver-stage development, just prior to or concurrent with

313 exoerythrocytic merozoite release (37). Compared with the type I IFN induced by host  
314 sensing of parasites, the quantity of BV-induced type I IFN and its speedy induction may  
315 make it more effective, resulting in its potent therapeutic and prophylactic effects. A better  
316 understanding of the molecular mechanisms by which BV administration confers both  
317 protection and elimination of pre-erythrocytic parasites will provide new strategies for  
318 malaria drug and vaccine development.

319 IFN- $\alpha$  has been extensively explored for its efficacy in various disease conditions and is  
320 currently used as a standard treatment in several illnesses. However, its use is accompanied  
321 by a wide variety of possible side effects (38), such as autoimmune thyroiditis. This study  
322 found that BV intramuscular administration, which induced 8,619 pg/ml of IFN- $\alpha$  in mouse  
323 sera with normal levels of ALT, completely killed liver-stage parasites. The manufacturing  
324 cost of BV would be much lower than that of recombinant IFN- $\alpha$ . Thus, BV intramuscular  
325 administration also has great potential for use as an alternative IFN- $\alpha$ -based  
326 immunotherapy; its high biological activity, cost-effectiveness, non-invasive nature, and  
327 minimal adverse effects make it superior to the current IFN- $\alpha$  therapy using recombinant

328 IFN- $\alpha$  via intravenous administration.

329 In conclusion, BV effectively induces fast-acting innate immune responses that provide

330 powerful first lines of both defensive and offensive attacks against pre-erythrocytic

331 parasites. Our results illustrate the great potential of baculovirus as a new potent

332 prophylactic and therapeutic immunostimulatory agent against preerythrocytic-stage

333 parasites. We propose that these baculovirus-based vaccine and drug strategies could be

334 applicable not only for malaria but also for other infectious diseases.

335



336 **MATERIALS AND METHODS**

337 **Animals, cell lines, parasites, and mosquitoes**

338 Female inbred BALB/c ( $H-2^d$ ) mice were obtained from Japan SLC (Hamamatsu, Shizuoka,  
339 Japan) and used in all experiments at 7–8 weeks of age. TLR9-deficient (TLR9<sup>-/-</sup>) mice on a  
340 BALB/c background were kindly provided by S. Akira (University of Osaka, Suita, Japan).  
341 *Spodoptera frugiperda* and HepG2 cells were maintained as described previously (13).  
342 Three transgenic *P. berghei* ANKA parasites were used in this study: GFP-*P. berghei*  
343 (Pb-conGFP) (39), luciferase-*P. berghei* (Pb-Luc) (40), and PfCSP-*P. berghei*  
344 (PfCSP-Tc/Pb) (41). These transgenic parasites were maintained by cyclical passaging  
345 through BALB/c mice and *Anopheles stephensi* (SDA 500 strain) at the Kanazawa  
346 University and Jichi Medical University according to a standard protocol (12, 42).

347

348 **Ethics statement**

349 All animal care and handling procedures were approved by the Animal Care and Ethical  
350 Review Committee of Kanazawa University (no. 22118–1) and Jichi Medical University

351 (no. 09193) Japan. For animal experiments, all efforts were made to minimize suffering in  
352 the animals. Mice were anesthetized with ketamine (100 mg/kg; intramuscular; Daiichi  
353 Sankyo, Tokyo, Japan) and xylazine (10 mg/kg; intramuscular; Bayer, Tokyo, Japan) when  
354 necessary.

355

### 356 **Recombinant viruses**

357 The recombinant baculoviruses BES-GL3 and BDES-sPfCSP2-WPRE-Spider have been  
358 described previously (19). The purified baculovirus particles were free of endotoxin ( $<0.01$   
359 endotoxin units/ $10^9$  pfu), as determined by the Endospecky<sup>®</sup> endotoxin measurement kit  
360 (Seikagaku Co., Tokyo, Japan). The recombinant adenoviruses AdHu5-Luc and  
361 AdHu5-sPfCSP2 have been described previously (14). In this paper,  
362 BDES-sPfCSP2-WPRE-Spider and AdHu5-sPfCSP2 are described as BDES-PfCSP and  
363 AdHu5-PfCSP, respectively.

364

### 365 **Collection of sporozoites**

366 *An. stephensi* mosquitoes were infected by feeding on infected mice using standard  
367 methods of mosquito infection. On days 21–24 post-infection, the salivary glands of the  
368 mosquitoes were collected by hand-dissection. Salivary glands were collected in DMEM  
369 (Thermo Fisher Scientific K.K., Tokyo, Japan) and homogenized in a plastic homogenizer.  
370 The free sporozoites were counted in a disposable haemocytometer counting chamber using  
371 phase-contrast microscopy.

372

### 373 **Analysis of protective effects against sporozoite parasites**

374 BALB/c mice were intravenously, intramuscularly, or intranasally administered  $10^4$ – $10^8$  pfu  
375 of BES-GL3. Alternatively, instead of BES-GL3, BALB/c mice were intramuscularly  
376 injected with 50  $\mu$ g of CpG ODN 1826 (TCCATgACgTTCCTgACgTT, Fasmac Inc.,  
377 Tokyo, Japan). The mice were intravenously challenged with 1,000 Pb-conGFP sporozoites  
378 or 1,000 pRBCs at various time intervals (6 h–14 days). The mice were checked for *P.*  
379 *berghei* blood-stage infection by microscopic examination of Giemsa-stained thin smears of  
380 their tail blood, prepared on days 5, 6, 7, 8, 11, and 14 post-challenge. The time required to

381 reach 1% parasitaemia was determined as described previously (43). A minimum of 20  
382 fields (magnification,  $\times 1,000$ ) were examined before a mouse was deemed to be negative  
383 for infection. Protection was defined as the complete absence of blood-stage parasitaemia  
384 on day 14 post-challenge.

385

### 386 **Analysis of elimination effects on liver-stage parasites**

387 BALB/c mice were intravenously injected with 1,000 Pb-conGFP sporozoites and  
388 subsequently intravenously ( $10^7$  pfu) or intramuscularly ( $10^8$  pfu) injected with BES-GL3  
389 at various time intervals (6, 24, or 42 h post-infection). Alternatively, instead of BV, a  
390 single high (2 mg) or low (0.1 mg) dose of PQ (primaquine diphosphate 98%,  
391 Sigma-Aldrich, St. Louis, MO, USA), with corresponding concentrations of roughly 40  
392 mg/kg body weight and 20 mg/kg body weight respectively, was intraperitoneally  
393 administered 24 h after injection of 1,000 Pb-conGFP sporozoites. The mice were checked  
394 for *P. berghei* blood-stage infection and evaluated for 1% parasitaemia as described above.

395

396 ***In vivo* bioluminescent imaging**

397 BALB/c mice were intravenously or intramuscularly injected with BES-GL3 on day 0, and  
398 D-luciferin (15 mg/ml; OZ Biosciences, Marseille, France) was then intraperitoneally  
399 administered (150 µl/mouse) to these mice at various time points. The animals were  
400 anesthetized with a ketamine (100 mg/kg)/xylazine (10 mg/kg) mixture 10 min later, and  
401 the luciferase expression was detected with an IVIS<sup>®</sup> Lumina LT *in vivo* imaging system  
402 (PerkinElmer, Waltham, MA, USA). Alternatively, BALB/c mice were intravenously  
403 injected with 1,000 Pb-Luc sporozoites followed by BES-GL3 (10<sup>8</sup> pfu) intramuscular  
404 administration into the left thigh muscle 24 or 42 h later. At 72 h after the sporozoite  
405 injection, the luciferase expression was detected as described above. At days 5–14  
406 post-infection, the same mice were analysed for blood-stage infections by determination of  
407 the course of parasitaemia in Giemsa-stained thin blood films of tail blood.

408

409 **Cytokine, AST, and ALT assays**

410 BALB/c mice were intravenously or intramuscularly injected with BV, and sera were

411 subsequently harvested from whole blood obtained by cardiopuncture at various times and  
412 stored at  $-20^{\circ}\text{C}$  until analysis. The concentrations of cytokines in the sera were determined  
413 by sandwich ELISA using a Mouse IFN- $\gamma$  ELISA MAX<sup>TM</sup> standard kit (Biolegend Inc., San  
414 Diego, CA, USA), mouse IL-12/IL-23 (p40) ELISA MAX<sup>TM</sup> standard kit (Biolegend Inc.),  
415 or mouse TNF- $\alpha$  ELISA MAX<sup>TM</sup> deluxe kit (Biolegend Inc.) according to the  
416 manufacturer's instructions. The concentration of IFN- $\alpha$  was determined by sandwich  
417 ELISA as described previously. In brief, rat monoclonal antibody against mouse IFN- $\alpha$   
418 (PBL Biomedical Laboratories clone RMMA-1, Piscataway, NJ, USA) was used as the  
419 capture antibody (2  $\mu\text{g/ml}$  for coating), rabbit polyclonal antibody against mouse IFN- $\alpha$   
420 (PBL Biomedical Laboratories) was used at 80 neutralizing units per ml for detection, and  
421 HRP-conjugated goat anti-rabbit IgG (Bio-Rad, Hercules, CA, USA) was used as the  
422 secondary reagent. Recombinant mouse IFN- $\alpha$  (PBL Biomedical Laboratories) was used as  
423 the standard. The lower detection limits for the IFN- $\gamma$  and the IFN- $\alpha$  immunoassays were  
424 each  $<20$  pg/ml, whereas those for the IL-12 and the TNF- $\alpha$  immunoassays were each  $<10$   
425 pg/ml. The concentrations of ALT and AST in the sera were determined by using a

426 GPT/GOT assay kit (Transaminase CII-test; Wako Pure Chemical Industries, Ltd., Tokyo,  
427 Japan) according to manufacturer's instructions.

428

#### 429 **Serum transfer and IFN administration analysis**

430 Pooled sera were obtained from blood harvested by cardiopuncture from 5 BALB/c mice  
431 that had been intramuscularly injected with BES-GL3 6 h previously (at -6 h), and the  
432 concentrations of IFN- $\alpha$  and IFN- $\gamma$  were measured immediately. On the same day, the  
433 IFN- $\alpha$  and IFN- $\gamma$  in 100- $\mu$ l aliquots of the pooled sera were neutralized by incubation with  
434 sufficient amounts of anti-IFN- $\alpha$  (anti-mouse interferon alpha, rabbit serum; PBL  
435 Biomedical Laboratories) and anti-IFN- $\gamma$  (Ultra-LEAF<sup>TM</sup> purified anti-mouse IFN- $\gamma$   
436 antibody; BioLegend Inc.) antibodies, respectively, on ice for 6 h according to the  
437 manufacturer's instructions. At 24 h after being intravenously injected with 1,000  
438 Pb-conGFP sporozoites, BALB/c mice were then intravenously injected with 100  $\mu$ l of the  
439 sera that had been treated with either anti-IFN- $\alpha$  or anti-IFN- $\gamma$ . For the IFN administration  
440 experiment, BALB/c mice that had been intravenously injected with 1,000 Pb-conGFP

441 sporozoites 24 h before were then intravenously administered either 8,619 pg of IFN- $\alpha$  or  
442 4,705 pg of IFN- $\gamma$ . For each experiment, the mice were checked for *P. berghei* blood-stage  
443 infection and evaluated for 1% parasitaemia as described above.

444

#### 445 **RNA isolation from livers and qRT-PCR quantification**

446 BALB/c (WT or TLR9<sup>-/-</sup>) mice were intramuscularly injected with 10<sup>8</sup> pfu of BES-GL3.  
447 Alternatively, 50  $\mu$ g of CpG ODN1826 were administered intramuscularly. Six hours later,  
448 whole livers were obtained by dissection of the treated mice. Each whole liver was placed  
449 in a 5-ml plastic tube with a cap containing 4 ml of buffer RLT (Qiagen, Valencia, CA,  
450 USA) containing 1% 2-mercaptoethanol. Two stainless beads (5-mm external diameter)  
451 were added to the mixture. The tube was capped, attached to an  $\mu$ T-12 Beads Crusher  
452 (TAITEC, Saitama Japan), and vigorously shaken at 2,500 rpm for 3.5 min. Total RNA was  
453 isolated from 100- $\mu$ l aliquots of the homogenates by using the RNeasy kit (Qiagen). cDNA  
454 was synthesized by using random hexamers and Multiscribe reverse transcriptase (Applied  
455 Biosystems, Foster City, CA, USA). Quantitative analysis of RNA transcripts was



456 performed by real-time PCR with SYBR<sup>®</sup> Green Premix Ex Taq<sup>™</sup> (Takara, Tokyo, Japan).  
457 All oligonucleotide primers used for the real-time PCR are detailed in Table S3 in the  
458 supplemental material. Amplification of the *gapdh* gene was performed in each experiment.  
459 Each Ct value of the samples was standardized based on the *gapdh* Ct value ( $\Delta$ Ct), and  
460 each  $\Delta$ Ct value was normalized to that of the  $\Delta$ Ct value from PBS-treated control WT mice  
461 ( $\Delta\Delta$ Ct). Results are shown as the relative expression ( $1/2^{\Delta\Delta$ Ct).

462

#### 463 **Immunization and challenge infections**

#### 464 **Protective efficacy of heterologous AdHu5-prime/BDES-boost immunization against** 465 **sporozoite challenge**

466 BALB/c mice were intramuscularly immunized with a heterologous AdHu5-prime and  
467 BDES-boost regimen with a 3-week interval as described previously (14). Alternately,  
468 BALB/c mice were intramuscularly immunized with an AdHu5-prime and PBS-boost  
469 regimen with a 3-week interval. The 100- $\mu$ l vaccine doses contained  $5 \times 10^7$  pfu of  
470 AdHu5-PfCSP or  $1 \times 10^8$  pfu of BDES-PfCSP. The mice were intravenously challenged

471 with 1,000 PfCSP-Tc/Pb sporozoites at 24 h after the boost was administered, as described  
472 previously (44). The mice were checked for *P. berghei* blood-stage infection and evaluated  
473 for 1% parasitaemia as described above. Protected mice were intravenously re-challenged  
474 with 1,000 PfCSP-Tc/Pb sporozoites, and protection was defined as described above.

475

#### 476 **Statistical analysis**

477 Information on the study outline, sample size, and statistical analysis is shown in the main  
478 text, figures, and figure legends. A two-tailed Fisher's exact probability test was performed  
479 to determine the significance of differences in the protective efficacies of the vaccines,  
480 using SPSS software (version 19, Chicago, IL, USA). In all other experiments, statistical  
481 differences between the experimental groups were analysed by the methods described in the  
482 individual figure legends; *p* values of <0.05 were considered statistically significant.  
483 Statistical analyses were performed with either Prism version 7.0a (GraphPad Software Inc.,  
484 La Jolla, CA, USA) or Microsoft® Excel (Redmond, WA, USA).

485

486

487 **SUPPLEMENTAL MATERIAL**

488 Supplemental material for this article may be found at <https://XXXXXX>.

489 SUPPLEMENTAL FILE 1, PDF file, XXX MB.

490

491 **ACKNOWLEDGMENTS**

492 TLR9<sup>-/-</sup> mice were kindly provided by S. Akira (Osaka University). We would like to thank

493 K. Takagi, K. Genshi, M. Tokutake and C. Seki, for *An. stephensi* production and animal

494 care and T. Yoshii and T. Amano for cytokine ELISA and IVIS experiments. We are grateful

495 to Biologend Inc. for providing antisera. We thank Katie Oakley, PhD, from Edanz Group

496 ([www.edanzediting.com/ac](http://www.edanzediting.com/ac)) for editing the English text of a draft of this manuscript.

497 This work was supported, in part, by a Grant-in-Aid for Young Scientists (B) (JSPS

498 KAKENHI grant number 26860278), the Japan Foundation for Pediatric Research (2015),

499 and Cooperative Research Grants from NEKKEN 2014-7 (grant numbers 26-6, 27-5, 28-6

500 and 29-3) to M.I.; by Grants-in-Aid for Scientific Research (B) (JSPS KAKENHI grant

501 numbers 21390126 and 25305007) and a Grant-in-Aid for Challenging Exploratory

502 Research (JSPS KAKENHI grant number 24659460) to S.Y. T.B.E. was supported by a  
503 MEXT fellowship (153343). S.Y. and M.I. are named inventors on a patent pending related  
504 to baculovirus as a new agent against pre-erythrocytic malaria parasite (2018-57311).  
505 Neither of the products in this patent has been commercialized. All other authors declare  
506 that they have no competing interests. None of the authors have undertaken any  
507 consultancies relevant to this study.

508

509

510 **REFERENCES**

- 511 1. WHO. 2016. World Malaria Report 2016. World Malaria Report 2016.
- 512 2. Alving AS, Carson PE, Flanagan CL, Ickes CE. 1956. Enzymatic deficiency in  
513 primaquine-sensitive erythrocytes. *Science* 124:484-5.
- 514 3. Vergara U, Ferreira A, Schellekens H, Nussenzweig V. 1987. Mechanism of escape  
515 of exoerythrocytic forms (EEF) of malaria parasites from the inhibitory effects of  
516 interferon-gamma. *J Immunol* 138:4447-9.
- 517 4. Schofield L, Ferreira A, Altszuler R, Nussenzweig V, Nussenzweig RS. 1987.  
518 Interferon-gamma inhibits the intrahepatocytic development of malaria parasites in  
519 vitro. *J Immunol* 139:2020-5.
- 520 5. Schofield L, Villaquiran J, Ferreira A, Schellekens H, Nussenzweig R, Nussenzweig  
521 V. 1987. Gamma interferon, CD8<sup>+</sup> T cells and antibodies required for immunity to  
522 malaria sporozoites. *Nature* 330:664-6. doi:10.1038/330664a0.
- 523 6. Ferreira A, Schofield L, Enea V, Schellekens H, van der Meide P, Collins WE,  
524 Nussenzweig RS, Nussenzweig V. 1986. Inhibition of development of

- 525 exoerythrocytic forms of malaria parasites by gamma-interferon. Science  
526 232:881-4.
- 527 7. Boonhok R, Rachaphaew N, Duangmanee A, Chobson P, Pattaradilokrat S,  
528 Utaisincharoen P, Sattabongkot J, Ponpuak M. 2016. LAP-like process as an  
529 immune mechanism downstream of IFN-gamma in control of the human malaria  
530 *Plasmodium vivax* liver stage. Proc Natl Acad Sci U S A 113:E3519-28.  
531 doi:10.1073/pnas.1525606113.
- 532 8. Liehl P, Zuzarte-Luis V, Chan J, Zillinger T, Baptista F, Carapau D, Konert M,  
533 Hanson KK, Carret C, Lassnig C, Muller M, Kalinke U, Saeed M, Chora AF,  
534 Golenbock DT, Strobl B, Prudencio M, Coelho LP, Kappe SH, Superti-Furga G,  
535 Pichlmair A, Vigario AM, Rice CM, Fitzgerald KA, Barchet W, Mota MM. 2014.  
536 Host-cell sensors for *Plasmodium* activate innate immunity against liver-stage  
537 infection. Nat Med 20:47-53. doi:10.1038/nm.3424.
- 538 9. Abe T, Kaname Y, Wen X, Tani H, Moriishi K, Uematsu S, Takeuchi O, Ishii KJ,  
539 Kawai T, Akira S, Matsuura Y. 2009. Baculovirus induces type I interferon

- 540 production through toll-like receptor-dependent and -independent pathways in a  
541 cell-type-specific manner. J Virol 83:7629-40. doi: 10.1128/JVI.00679-09.
- 542 10. Moriyama T, Suzuki T, Chang MO, Kitajima M, Takaku H. 2017. Baculovirus  
543 directly activates murine NK cells via TLR9. Cancer Gene Ther 24:175-179.  
544 doi:10.1038/cgt.2017.2.
- 545 11. Kitajima M, Abe T, Miyano-Kurosaki N, Taniguchi M, Nakayama T, Takaku H.  
546 2008. Induction of natural killer cell-dependent antitumor immunity by the  
547 *Autographa californica* multiple nuclear polyhedrosis virus. Mol Ther 16:261-8.  
548 doi:10.1038/sj.mt.6300364.
- 549 12. Yoshida S, Kawasaki M, Hariguchi N, Hirota K, Matsumoto M. 2009. A  
550 baculovirus dual expression system-based malaria vaccine induces strong protection  
551 against *Plasmodium berghei* sporozoite challenge in mice. Infect Immun 77:1782-9.  
552 doi: 10.1128/IAI.01226-08 [doi].
- 553 13. Iyori M, Nakaya H, Inagaki K, Pichyangkul S, Yamamoto DS, Kawasaki M, Kwak  
554 K, Mizukoshi M, Goto Y, Matsuoka H, Matsumoto M, Yoshida S. 2013. Protective

- 555 efficacy of baculovirus dual expression system vaccine expressing *Plasmodium*  
556 *falciparum* circumsporozoite protein. PLoS One 8:e70819.  
557 doi:10.1371/journal.pone.0070819.
- 558 14. Yoshida K, Iyori M, Blagborough AM, Salman AM, Dulal P, Sala KA, Yamamoto  
559 DS, Khan SM, Janse CJ, Biswas S, Yoshii T, Yusuf Y, Tokoro M, Hill AVS, Yoshida  
560 S. 2018. Adenovirus-prime and baculovirus-boost heterologous immunization  
561 achieves sterile protection against malaria sporozoite challenge in a murine model.  
562 Scientific Reports 8:3896. doi:10.1038/s41598-018-21369-y.
- 563 15. Yoshida S, Araki H, Yokomine T. 2010. Baculovirus-based nasal drop vaccine  
564 confers complete protection against malaria by natural boosting of vaccine-induced  
565 antibodies in mice. Infect Immun 78:595-602. doi: 10.1128/IAI.00877-09.
- 566 16. Yoshida S, Nagumo H, Yokomine T, Araki H, Suzuki A, Matsuoka H. 2010.  
567 *Plasmodium berghei* circumvents immune responses induced by merozoite surface  
568 protein 1- and apical membrane antigen 1-based vaccines. PLoS One 5:e13727.  
569 doi:10.1371/journal.pone.0013727.



- 570 17. Mlambo G, Kumar N, Yoshida S. 2010. Functional immunogenicity of baculovirus  
571 expressing Pfs25, a human malaria transmission-blocking vaccine candidate antigen.  
572 *Vaccine* 28:7025-9. doi:10.1016/j.vaccine.2010.08.022.
- 573 18. Blagborough AM, Yoshida S, Sattabongkot J, Tsuboi T, Sinden RE. 2010. Intranasal  
574 and intramuscular immunization with Baculovirus Dual Expression System-based  
575 Pvs25 vaccine substantially blocks *Plasmodium vivax* transmission. *Vaccine*  
576 28:6014-20. doi:10.1016/j.vaccine.2010.06.100.
- 577 19. Iyori M, Yamamoto DS, Sakaguchi M, Mizutani M, Ogata S, Nishiura H, Tamura T,  
578 Matsuoka H, Yoshida S. 2017. DAF-shielded baculovirus-vectored vaccine  
579 enhances protection against malaria sporozoite challenge in mice. *Malar J* 16:390.  
580 doi:10.1186/s12936-017-2039-x.
- 581 20. Luo WY, Lin SY, Lo KW, Lu CH, Hung CL, Chen CY, Chang CC, Hu YC. 2013.  
582 Adaptive immune responses elicited by baculovirus and impacts on subsequent  
583 transgene expression in vivo. *J Virol* 87:4965-73. doi:10.1128/JVI.03510-12.
- 584 21. Hofmann C, Sandig V, Jennings G, Rudolph M, Schlag P, Strauss M. 1995. Efficient

- 585 gene transfer into human hepatocytes by baculovirus vectors. Proc Natl Acad Sci U  
586 S A 92:10099-103.
- 587 22. Hofmann C, Strauss M. 1998. Baculovirus-mediated gene transfer in the presence of  
588 human serum or blood facilitated by inhibition of the complement system. Gene  
589 Ther 5:531-6.
- 590 23. Gramzinski RA, Doolan DL, Sedegah M, Davis HL, Krieg AM, Hoffman SL. 2001.  
591 Interleukin-12- and gamma interferon-dependent protection against malaria  
592 conferred by CpG oligodeoxynucleotide in mice. Infect Immun 69:1643-9.  
593 doi:10.1128/iai.69.3.1643-1649.2001.
- 594 24. Abe T, Hemmi H, Miyamoto H, Moriishi K, Tamura S, Takaku H, Akira S,  
595 Matsuura Y. 2005. Involvement of the Toll-like receptor 9 signaling pathway in the  
596 induction of innate immunity by baculovirus. J Virol 79:2847-58.
- 597 25. Suzuki T, Chang MO, Kitajima M, Takaku H. 2010. Baculovirus activates murine  
598 dendritic cells and induces non-specific NK cell and T cell immune responses. Cell  
599 Immunol 262:35-43. doi:10.1016/j.cellimm.2009.12.005.

- 600 26. Garnham PC. 1980. Malaria in its various vertebrate hosts. In J P Kreier (ed),  
601 Malaria, vol 1 Epidemiology, Chemotherapy, Morphology, and Metabolism  
602 Academic Press, Inc, New York:96-144.
- 603 27. Collins WE, Jeffery GM. 1996. Primaquine resistance in *Plasmodium vivax*. Am J  
604 Trop Med Hyg 55:243-9.
- 605 28. Baird JK. 2009. Resistance to therapies for infection by *Plasmodium vivax*. Clin  
606 Microbiol Rev 22:508-34. doi:10.1128/cmr.00008-09.
- 607 29. Kawabata T, Kinoshita M, Inatsu A, Habu Y, Nakashima H, Shinomiya N, Seki S.  
608 2008. Functional alterations of liver innate immunity of mice with aging in response  
609 to CpG-oligodeoxynucleotide. Hepatology 48:1586-97. doi:10.1002/hep.22489.
- 610 30. Sparwasser T, Hultner L, Koch ES, Luz A, Lipford GB, Wagner H. 1999.  
611 Immunostimulatory CpG-oligodeoxynucleotides cause extramedullary murine  
612 hemopoiesis. J Immunol 162:2368-74.
- 613 31. Miller JL, Sack BK, Baldwin M, Vaughan AM, Kappe SH. 2014.  
614 Interferon-mediated innate immune responses against malaria parasite liver stages.

- 615 Cell Rep 7:436-47. doi:10.1016/j.celrep.2014.03.018.
- 616 32. Der SD, Zhou A, Williams BR, Silverman RH. 1998. Identification of genes  
617 differentially regulated by interferon alpha, beta, or gamma using oligonucleotide  
618 arrays. Proc Natl Acad Sci U S A 95:15623-8.
- 619 33. Sadler AJ, Williams BR. 2008. Interferon-inducible antiviral effectors. Nat Rev  
620 Immunol 8:559-68. doi:10.1038/nri2314.
- 621 34. Fracisco S, Teja-isavadharm P, Gettayacamin M, Berman J, Li Q, Melendez V,  
622 Saunders D, Xie L, Ohrt C. 2014. Anti-relapse activity of mirincamycin in the  
623 *Plasmodium cynomolgi* sporozoite-infected Rhesus monkey model. Malar J 13:409.  
624 doi:10.1186/1475-2875-13-409.
- 625 35. Clyde DF. 1981. Clinical problems associated with the use of primaquine as a tissue  
626 schizontocidal and gametocytocidal drug. Bull World Health Organ 59:391-5.
- 627 36. Polhemus ME, Remich SA, Ogutu BR, Waitumbi JN, Otieno L, Apollo S,  
628 Cummings JF, Kester KE, Ockenhouse CF, Stewart A, Ofori-Anyinam O, Ramboer  
629 I, Cahill CP, Lievens M, Dubois MC, Demoitie MA, Leach A, Cohen J, Ballou RW,

- 630 Heppner GD. 2009. Evaluation of RTS,S/AS02A and RTS,S/AS01B in adults in a  
631 high malaria transmission area. PLoS ONE 4:e6465.  
632 doi:10.1371/journal.pone.0006465.
- 633 37. van de Sand C, Horstmann S, Schmidt A, Sturm A, Bolte S, Krueger A,  
634 Lutgehetmann M, Pollok JM, Libert C, Heussler VT. 2005. The liver stage of  
635 *Plasmodium berghei* inhibits host cell apoptosis. Mol Microbiol 58:731-42.  
636 doi:10.1111/j.1365-2958.2005.04888.x.
- 637 38. Sleijfer S, Bannink M, Van Gool AR, Kruit WH, Stoter G. 2005. Side effects of  
638 interferon-alpha therapy. Pharm World Sci 27:423-31.  
639 doi:10.1007/s11096-005-1319-7.
- 640 39. Franke-Fayard B, Trueman H, Ramesar J, Mendoza J, van der Keur M, van der  
641 Linden R, Sinden RE, Waters AP, Janse CJ. 2004. A *Plasmodium berghei* reference  
642 line that constitutively expresses GFP at a high level throughout the complete life  
643 cycle. Mol Biochem Parasitol 137:23-33. doi:10.1016/j.molbiopara.2004.04.007.
- 644 40. Matsuoka H, Tomita H, Hattori R, Arai M, Hirai M. 2015. Visualization of malaria

- 645 parasites in the skin using the luciferase transgenic parasite, *Plasmodium berghei*.  
646 Trop Med Health 43:53-61. doi:10.2149/tmh.2014-18.
- 647 41. Sumitani M, Kasashima K, Yamamoto DS, Yagi K, Yuda M, Matsuoka H, Yoshida S.  
648 2013. Reduction of malaria transmission by transgenic mosquitoes expressing an  
649 antisporozoite antibody in their salivary glands. Insect Mol Biol 22:41-51.  
650 doi:10.1111/j.1365-2583.2012.01168.x.
- 651 42. Yamamoto DS, Sumitani M, Nagumo H, Yoshida S, Matsuoka H. 2012. Induction  
652 of antisporozoite antibodies by biting of transgenic *Anopheles stephensi* delivering  
653 malarial antigen via blood feeding. Insect Mol Biol 21:223-33.
- 654 43. Epstein JE, Tewari K, Lyke KE, Sim BK, Billingsley PF, Laurens MB, Gunasekera  
655 A, Chakravarty S, James ER, Sedegah M, Richman A, Velmurugan S, Reyes S, Li  
656 M, Tucker K, Ahumada A, Ruben AJ, Li T, Stafford R, Eappen AG, Tamminga C,  
657 Bennett JW, Ockenhouse CF, Murphy JR, Komisar J, Thomas N, Loyevsky M,  
658 Birkett A, Plowe CV, Loucq C, Edelman R, Richie TL, Seder RA, Hoffman SL.  
659 2011. Live attenuated malaria vaccine designed to protect through hepatic CD8 T

- 660 cell immunity. *Science* 334:475-80. doi:10.1126/science.1211548.
- 661 44. Bauza K, Malinauskas T, Pfander C, Anar B, Jones EY, Billker O, Hill AV,  
662 Reyes-Sandoval A. 2014. Efficacy of a *Plasmodium vivax* malaria vaccine using  
663 ChAd63 and modified vaccinia Ankara expressing thrombospondin-related  
664 anonymous protein as assessed with transgenic *Plasmodium berghei* parasites.  
665 *Infect Immun* 82:1277-86. doi:10.1128/iai.01187-13.
- 666
- 667

668 **FIGURE LEGENDS**

669 **Figure 1. BV administration via intravenous vs intramuscular routes for transgene**  
670 **expression and innate immune responses.** (A, B) Luciferase expression at different time  
671 points after intramuscular ( $10^8$  pfu) (A) or intravenous ( $10^7$  pfu) (B) administration of  
672 luciferase-expressing BES-GL3 (described as BV), detected by using the IVIS<sup>®</sup> Lumina LT  
673 *in vivo* imaging system. The heat map image visible in the mice represents the total flux of  
674 photons (p/sec/cm<sup>2</sup>) in that area. Rainbow scales are expressed in radiance (p/s/cm<sup>2</sup>/sr). (C,  
675 D) Kinetics of proinflammatory cytokines, IFN- $\gamma$  (C) and TNF- $\alpha$  (D), in the sera at  
676 different time points post-BV intravenous administration ( $10^7$  pfu) (n = 6). (E, F) Kinetics  
677 of liver damage markers. ALT (E) and AST (F) in the sera after BV intravenous  
678 administration ( $10^7$  pfu) (n = 6). (G, H) Comparison of ALT (G) and AST (H) in the sera at  
679 6 h after intramuscular ( $10^8$  pfu) or intravenous ( $10^7$  pfu) administration of BV (n = 6).  
680 (C-H) Bars or points are the mean  $\pm$  SD. (G, H) The difference from the PBS group was  
681 assessed by a Kruskal-Wallis test with Dunn's correction. \*\*\* $p < 0.001$ . i.m.,  
682 intramuscular; i.v., intravenous.



683

684 **Figure 2. BV intramuscular administration completely eliminates liver-stage parasites.**

685 (A, B) Challenge infection with Pb-Luc sporozoites at 0 h, followed by BES-GL3

686 (described as BV) intramuscular administration ( $10^8$  pfu) at indicated time points.

687 Luminescence in the liver shows parasite growth, whereas that in the thigh originates from

688 the BV injection. The heat map images visible in the mice represent the total flux of

689 photons ( $\text{p/s/cm}^2$ ) in that area. Rainbow scales are expressed in radiance ( $\text{p/s/cm}^2/\text{sr}$ ). (C, D)

690 Delay of parasitaemia in infected mice. Parasitaemia of groups of infected mice shown in

691 Table 2 ( $10^6$  or  $10^4$  pfu of BV injected intramuscularly 24 h post-infection,  $10^8$  pfu of BV

692 injected intramuscularly 42 h post-infection, and PQ low dose administered 24 h

693 post-infection) and Table 3 (CpG administered 24 h post-infection). Bars or points are the

694 mean  $\pm$  SD. The difference from the PBS group was assessed by a two-way ANOVA. \* $p <$

695 0.05, \*\* $p < 0.01$ , \*\*\* $p < 0.001$ , \*\*\*\* $p < 0.0001$ . i.m., intramuscular; i.v., intravenous.

696

697 **Figure 3. IFN- $\alpha$  induced by BV intramuscular administration contributes to**

698 **elimination of liver-stage parasites.** (A-C) Levels of IFN- $\alpha$  (A), IFN- $\gamma$  (B), and IL-12 (C)  
699 in sera from WT or TLR9<sup>-/-</sup> mice 6 h after intramuscular administration of BES-GL3  
700 (described as BV) ( $10^8$  pfu), CpG, or PBS (n = 9–10). Bars are means  $\pm$  SD. (D, E)  
701 Prediction of the time to reach 1% parasitaemia. (D) Results of serum transfer assay to  
702 determine the role of IFN- $\alpha$  and IFN- $\gamma$  in the elimination of liver-stage parasites. Sera  
703 collected from mice 6 h after BV administration were neutralized by either anti-IFN- $\alpha$  or  
704 anti-IFN- $\gamma$  antibody. Passive transfer of antibody-treated sera, non-treated sera, or PBS was  
705 conducted 24 h after sporozoite infection (n = 5). (E) Effect of exogenous IFN- $\alpha$  or IFN- $\gamma$   
706 on the elimination of liver-stage parasites. Recombinant mouse IFN- $\alpha$  or IFN- $\gamma$  was  
707 intravenously administered 24 h after sporozoite infection (n = 5). (A-E) The difference  
708 from the PBS group was assessed by a Kruskal-Wallis test with Dunn's correction. \* $p$  <  
709 0.05, \*\* $p$  < 0.01, \*\*\* $p$  < 0.001, \*\*\*\* $p$  < 0.0001.

710

711 **Figure 4. BV intramuscular administration induces ISGs in the liver.** Gene expression  
712 of antiviral proteins (A), IFITs (B), and IRFs (C) in the livers of WT and TLR9<sup>-/-</sup> mice at 6

713 h after intramuscular administration of BES-GL3 (described as BV) ( $10^8$  pfu) was  
714 measured by real-time RT-PCR (n = 5–7). Bars are means  $\pm$  SEM. The difference from the  
715 PBS group was assessed by a Mann-Whitney's U test. \* $p$  < 0.05, \*\* $p$  < 0.01.

716

717

718

1 **Table 1. Protective efficacy of BV injection against *P. berghei* sporozoite challenge<sup>a, b</sup>**

| Treatment <sup>a</sup> | Dose (Route <sup>c</sup> )     | Time interval of challenge after administration | %Protection (protection/total) <sup>d</sup> |
|------------------------|--------------------------------|-------------------------------------------------|---------------------------------------------|
| PBS                    | (i.v.)                         | 6 h                                             | 0 (0/8) <sup>e</sup>                        |
| BV                     | 1 x 10 <sup>7</sup> pfu (i.v.) | 6 h                                             | 100 (8/8)                                   |
| AdHu5-luc              | 5 x 10 <sup>7</sup> pfu (i.v.) | 6 h                                             | 0 (0/3)                                     |
| PBS                    | (i.m.)                         | 12 h – 14 days                                  | 0 (0/20) <sup>e</sup>                       |
| BV                     | 1 x 10 <sup>8</sup> pfu (i.m.) | 12 h                                            | 100 (5/5)                                   |
| BV                     | 1 x 10 <sup>8</sup> pfu (i.m.) | 24 h                                            | 100 (5/5)                                   |
| BV                     | 1 x 10 <sup>8</sup> pfu (i.m.) | 3 days                                          | 100 (5/5)                                   |
| BV                     | 1 x 10 <sup>8</sup> pfu (i.m.) | 5 days                                          | 100 (5/5)                                   |
| BV                     | 1 x 10 <sup>8</sup> pfu (i.m.) | 7 days                                          | 100 (5/5)                                   |
| BV                     | 1 x 10 <sup>8</sup> pfu (i.m.) | 14 days                                         | 0 (0/5)                                     |
| BV                     | 1 x 10 <sup>8</sup> pfu (i.n.) | 6 h                                             | 0 (0/3)                                     |
| BV                     | 1 x 10 <sup>7</sup> pfu (i.v.) | 6 h/1,000 pRBC <sup>f</sup>                     | 0 (0/5)                                     |
| CpG                    | 50 µg (i.m.)                   | 6 h                                             | 90 (9/10) <sup>e</sup>                      |
| CpG                    | 50 µg (i.m.)                   | 24 h                                            | 80 (4/5)                                    |

2 <sup>a</sup>BALB/c mice were injected with BES-GL3 (described as BV) by the indicated route. After the indicated  
3 interval, mice were intravenously challenged with 1,000 Pb - conGFP sporozoites. Parasitaemia was  
4 monitored on days 5-8, 11, and 14 after sporozoite challenge. Once parasites appeared in the blood, all mice  
5 died.

6 <sup>b</sup>Scheme of the experimental design is shown in Fig. S2A.

7 <sup>c</sup>i.v., intravenous; i.n., intranasal; i.m., intramuscular

8 <sup>d</sup>Protection is defined as the complete absence of blood-stage parasitaemia on day 14 post-challenge.

- 9 °Cumulative data from two or four experiments
- 10 †BALB/c mice were intravenously challenged with 1,000 Pb-conGFP-pRBC.

1 **Table 2. Elimination of liver-stage parasites by BV administration<sup>a, b</sup>**

| Treatment <sup>a</sup> | Dose (Route <sup>c</sup> )     | Time interval of administration after challenge | %Elimination (uninfected/total) |
|------------------------|--------------------------------|-------------------------------------------------|---------------------------------|
| PBS                    | (i.v.)                         | 24 h                                            | 0 (0/12) <sup>e</sup>           |
| BV                     | 1 x 10 <sup>7</sup> pfu (i.v.) | 24 h                                            | 100 (13/13) <sup>e</sup>        |
| BV                     | 1 x 10 <sup>7</sup> pfu (i.v.) | 42 h                                            | 0 (0/3)                         |
| PBS                    | (i.m.)                         | 24 h                                            | 0 (0/9) <sup>e</sup>            |
| BV                     | 1 x 10 <sup>8</sup> pfu (i.m.) | 24 h                                            | 100 (7/7)                       |
| BV                     | 1 x 10 <sup>6</sup> pfu (i.m.) | 24 h                                            | 0 (0/5) <sup>f</sup>            |
| BV                     | 1 x 10 <sup>4</sup> pfu (i.m.) | 24 h                                            | 0 (0/5) <sup>f</sup>            |
| BV                     | 1 x 10 <sup>8</sup> pfu (i.m.) | 42 h                                            | 0 (0/3) <sup>f</sup>            |
| PQ (High) <sup>d</sup> | 2 mg (i.p.)                    | 24 h                                            | 100 (5/5)                       |
| PQ (Low) <sup>d</sup>  | 0.1 mg (i.p.)                  | 24 h                                            | 0 (0/5) <sup>f</sup>            |

2 <sup>a</sup>BALB/c mice were intravenously injected with 1,000 Pb-conGFP sporozoites. After the indicated interval, mice  
 3 were administrated either with BES-GL3 (described as BV) or PQ. Parasitaemia was monitored on days 5-8, 11,  
 4 and 14 after sporozoite injection. Once parasites appeared in the blood, all mice died.

5 <sup>b</sup>Scheme of the experimental design is shown in Fig. S2B.

6 <sup>c</sup>i.v., intravenous; i.m., intramuscular; i.p., intraperitoneal

7 <sup>d</sup>The two different doses of PQ were administrated to eliminate liver-stage parasites. High dose (2 mg/100 µl) and  
 8 low dose (0.1 mg/100 µl) were 533 and 27 times, respectively, higher than WHO recommended dose for human  
 9 per weight.

10 <sup>e</sup>Cumulative data from three experiments.

1 **Table 3. Elimination of liver-stage parasites by BV injection in TLR9<sup>-/-</sup> mice<sup>a</sup>**

| Treatment <sup>a</sup> | Mouse strain        | Dose                    | Time interval of administration after challenge | %Elimination (uninfected/total) |
|------------------------|---------------------|-------------------------|-------------------------------------------------|---------------------------------|
| PBS                    | TLR9 <sup>-/-</sup> | -                       | 24 h                                            | 0 (0/7)                         |
| BV                     | TLR9 <sup>-/-</sup> | 1 x 10 <sup>8</sup> pfu | 24 h                                            | 100 (7/7)                       |
| BV                     | WT                  | 1 x 10 <sup>8</sup> pfu | 24 h                                            | 100 (5/5)                       |
| CpG                    | WT                  | 50 µg                   | 6 h                                             | 100 (5/5)                       |
| CpG                    | WT                  | 50 µg                   | 24 h                                            | 0 (0/4) <sup>b</sup>            |
| CpG                    | TLR9 <sup>-/-</sup> | 50 µg                   | 24 h                                            | 0 (0/5)                         |

2 <sup>a</sup>TLR9<sup>-/-</sup> (BALB/c background) or WT mice were intravenously injected with 1,000 Pb-conGFP sporozoites. After 24 h, mice  
3 were intramuscularly administrated either with BES-GL3 (described as BV) or CpG ODN 1826 (described as CpG).  
4 Parasitaemia was monitored on days 5-8, 11, and 14 after sporozoite injection. Once parasites appeared in the blood, all mice  
5 died.

6 <sup>b</sup>Significant delay of parasitaemia was observed in infected mice, compared with the PBS group as showing in Fig. 2C.

7

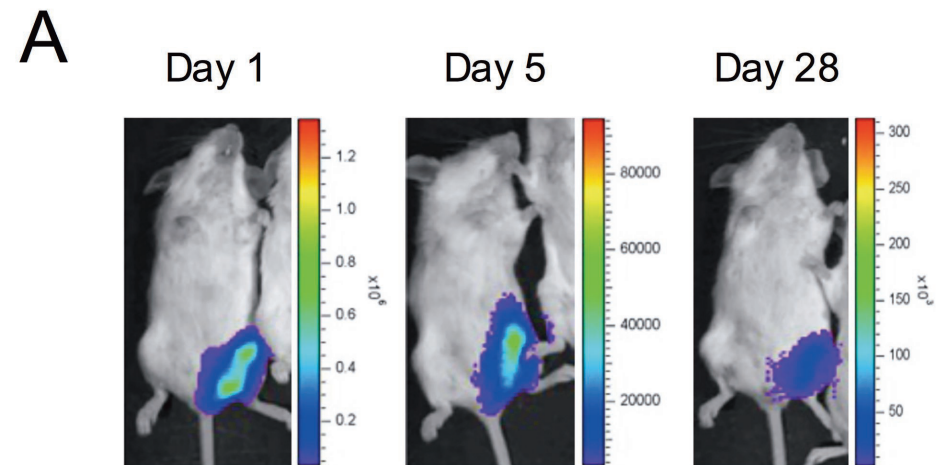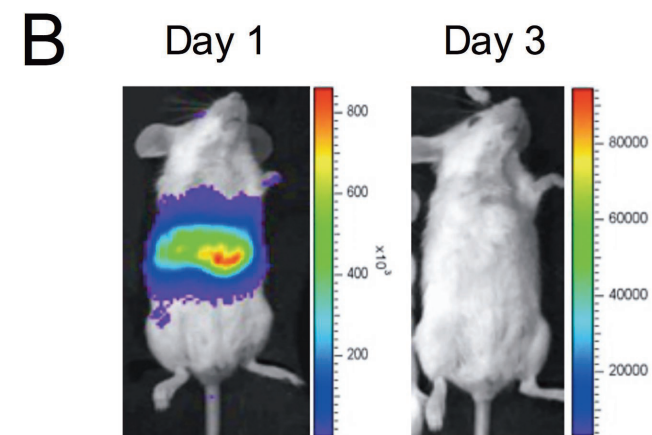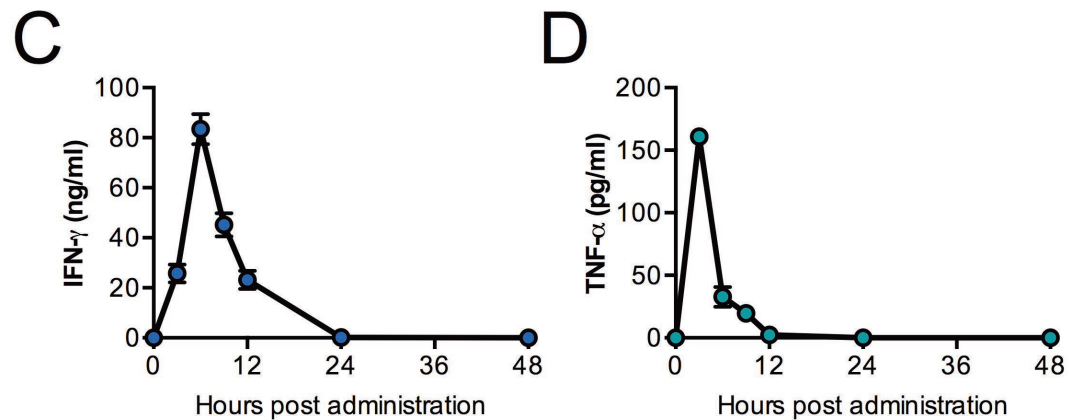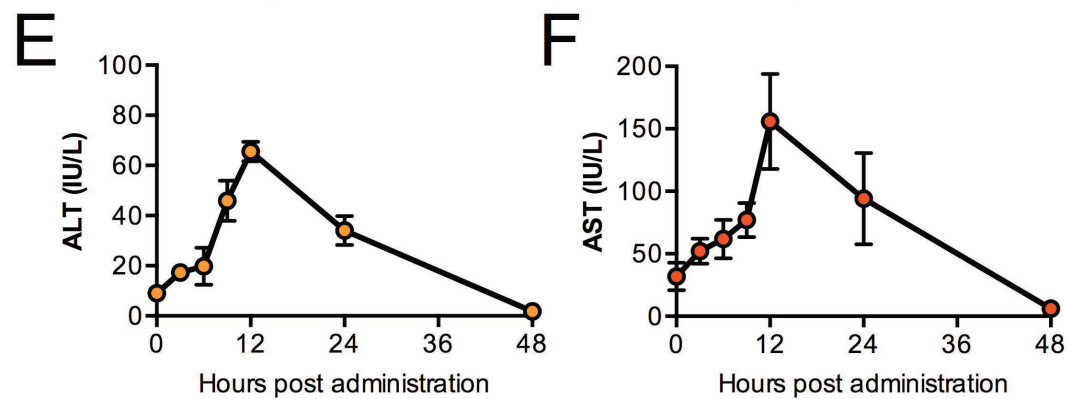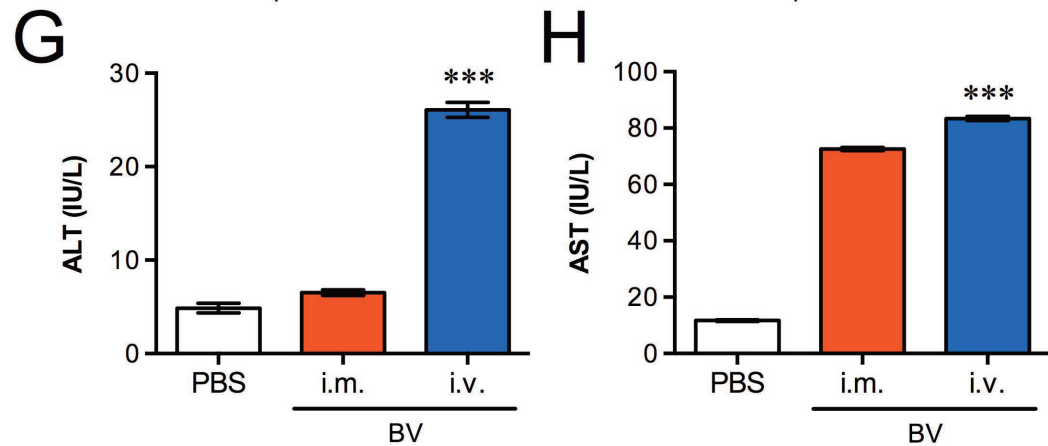



# A Time post Pb-Luc spz infection

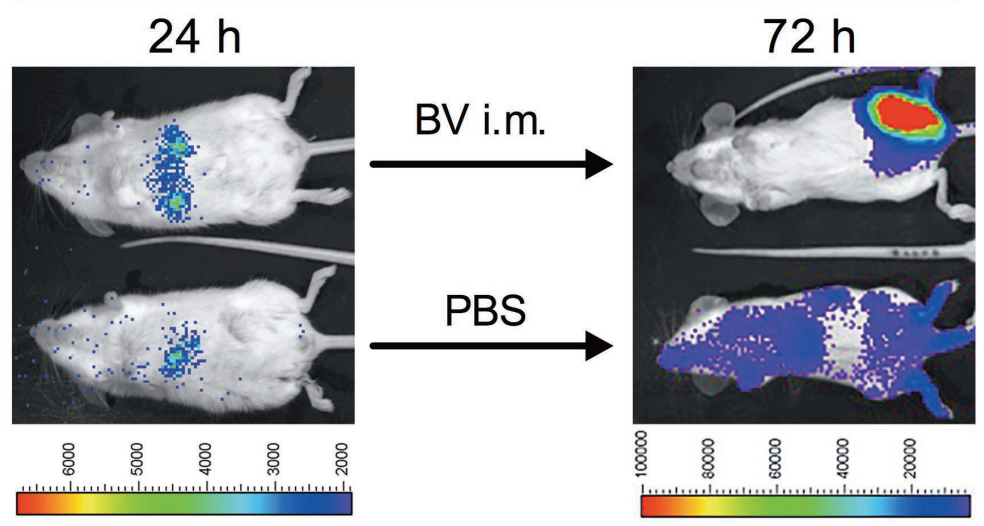

# B Time post Pb-Luc spz infection

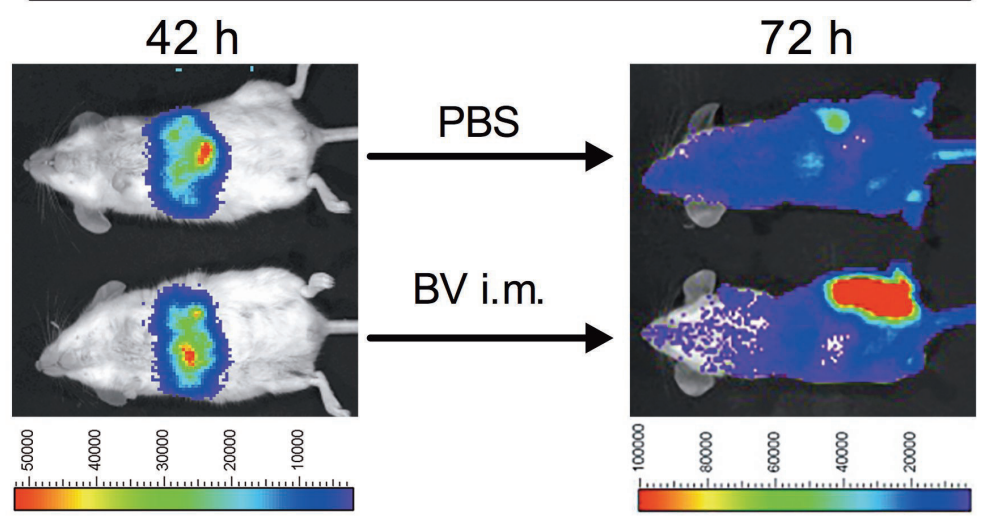

# C

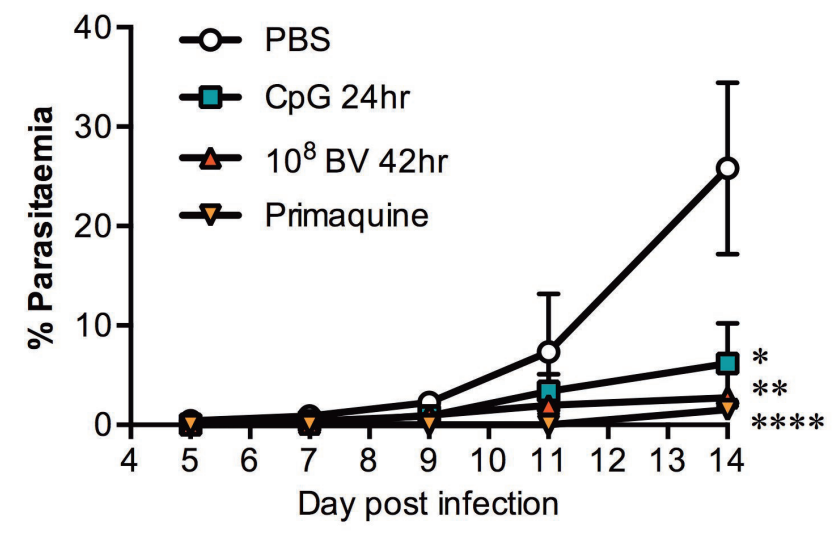

# D

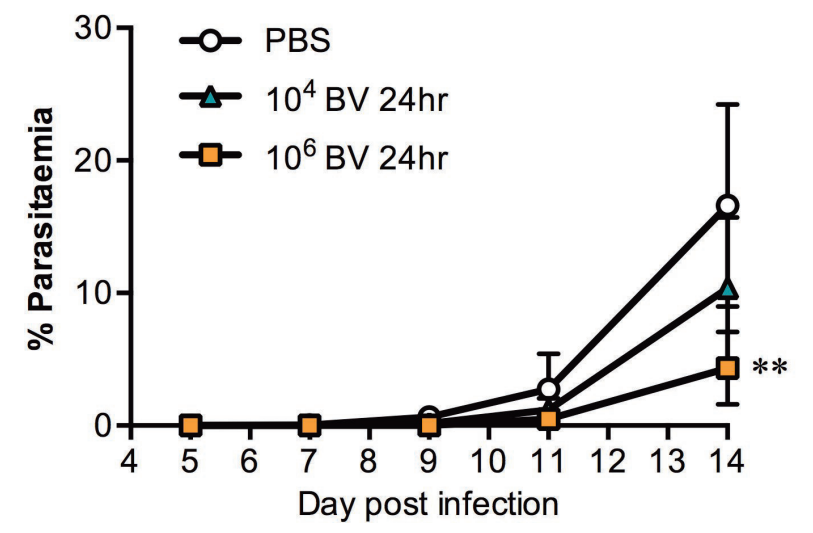

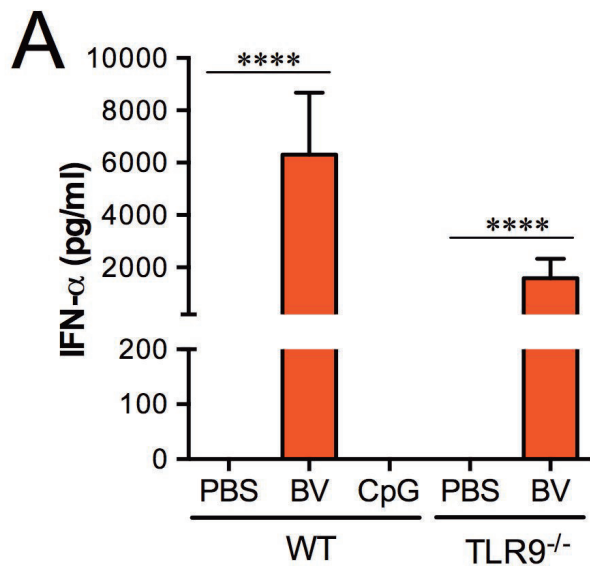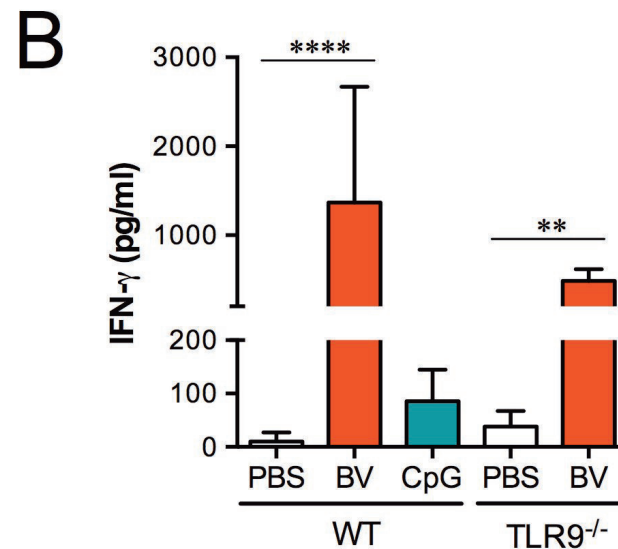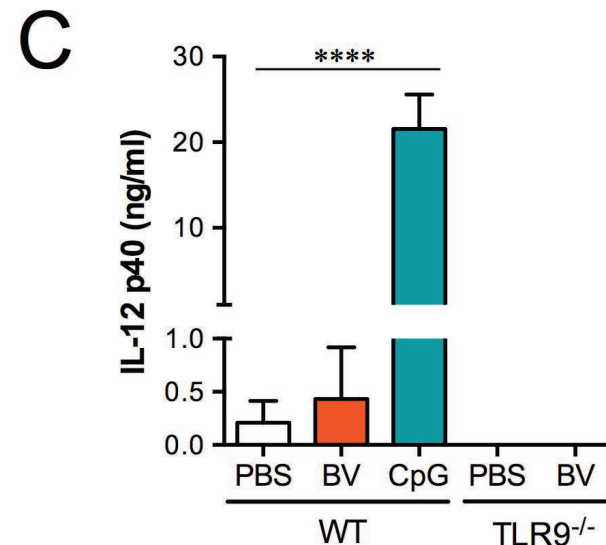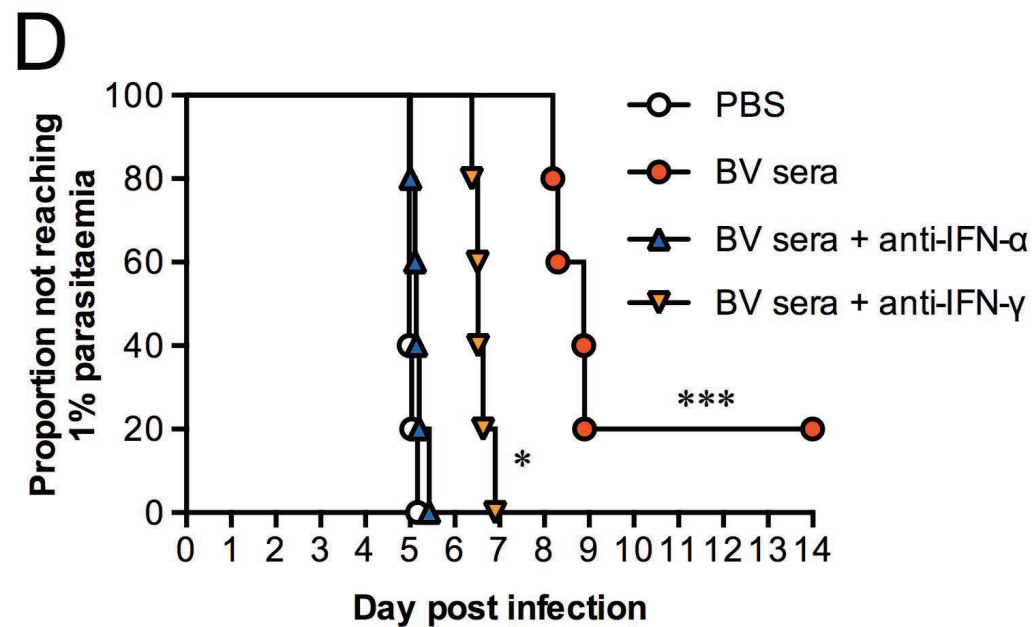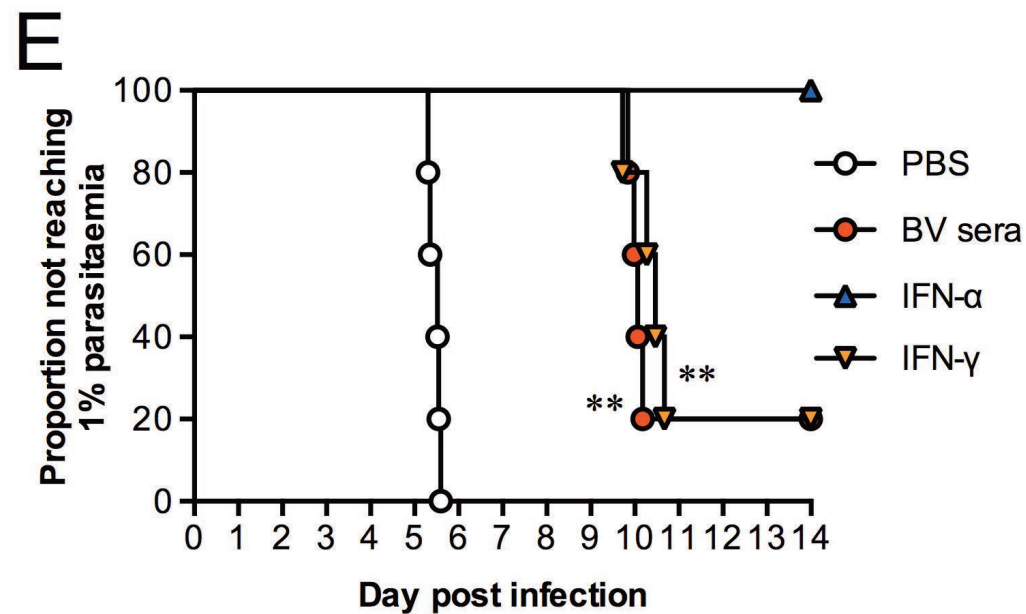

**A**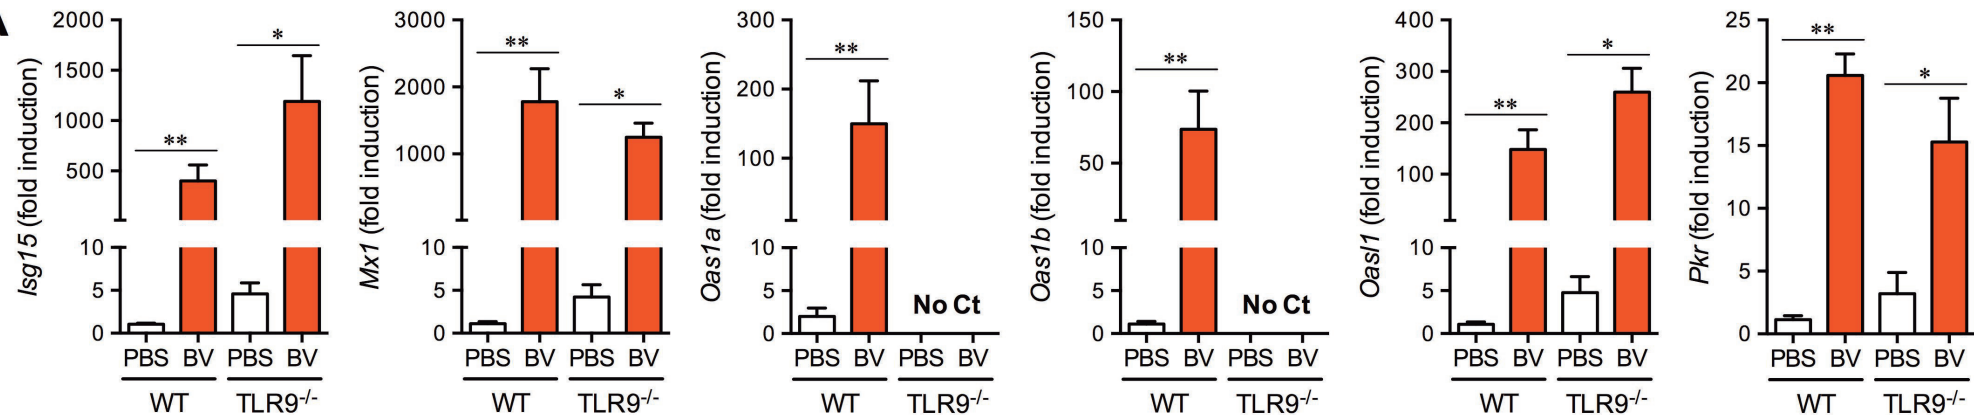**B**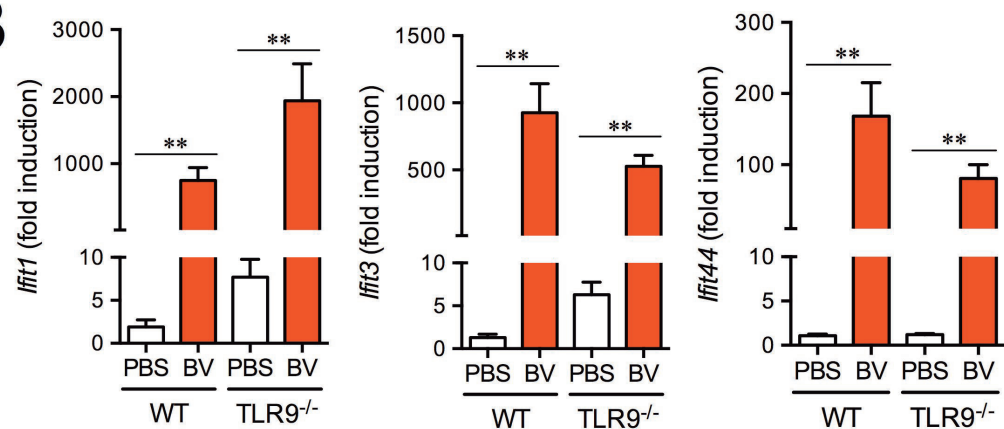**C**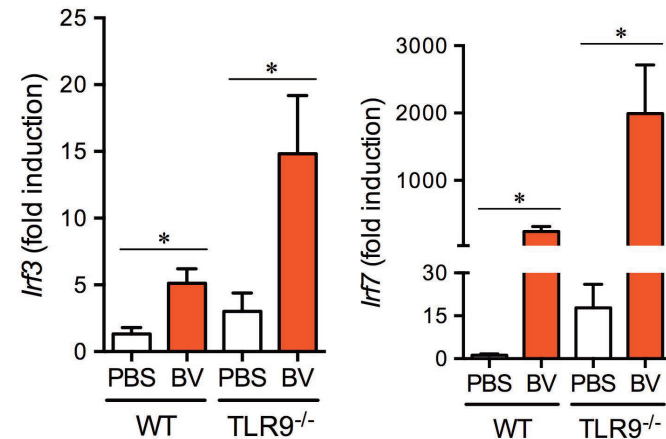

Source: https://www.biorxiv.org/content/10.1101/320036v1.full.pdf
